# Supplementary material for: Interepidemic Rift Valley Fever Virus Seropositivity, Northeastern Kenya
Source: PubMed Central journal article supplement (PMC2600406; doi:10.3201/eid1408.080082), 2008-08
Supplement: 08-0082_appT5-s7.pdf [file 08-0082_appT5-s7.pdf]

Appendix Table 5. Testing of association of eye disease with Rift Valley fever virus seropositivity

| Variable    | Test statistic* | p value† | Odds ratio |
|-------------|-----------------|----------|------------|
| Eye disease | 11.011          | 0.003    | 4.99       |

\*Pearson  $\chi^2$  test with Yates continuity correction.

†p<0.05 was statistically significant.
