# Supplementary material for: Interepidemic Rift Valley Fever Virus Seropositivity, Northeastern Kenya
Source: PubMed Central journal article supplement (PMC2600406; doi:10.3201/eid1408.080082), 2008-08
Supplement: 08-0082_Techapp1-s1.pdf [file 08-0082_Techapp1-s1.pdf]

# Interepidemic Rift Valley Fever Virus Seropositivity, Northeastern Kenya

## Technical Appendix 1

Study participants received the following structured interview regarding housing, animal exposure, motor function, visual function, and recent or remote Rift Valley fever-related symptoms.

| RVF Ijara Clinical Survey Form: PERSONAL DETAILS                 |                                     |
|------------------------------------------------------------------|-------------------------------------|
| <b>RVFID</b>                                                     | <input type="text" value="13"/>     |
| <b>First Name</b>                                                | <input type="text"/>                |
| <b>Second Name</b>                                               | <input type="text"/>                |
| <b>Third Name</b>                                                | <input type="text"/>                |
| <b>Other name</b>                                                | <input type="text"/>                |
| <b>Head of Household</b>                                         | <input type="text"/>                |
| <b>Relationship to HH</b>                                        | <input type="text"/>                |
| <b>House Number</b>                                              | <input type="text" value="0"/>      |
| <b>Do you Sleep at this house?</b>                               | <input checked="" type="checkbox"/> |
| <b>Do you Stay at this house?</b>                                | <input type="checkbox"/>            |
| <b>Village Number</b>                                            | <input type="text" value="0"/>      |
| <b>Date of Registration</b>                                      | <input type="text"/>                |
| <b>Year of Birth</b>                                             | <input type="text" value="0"/>      |
| <b>Sex</b>                                                       | <input type="text" value="0"/>      |
| <b>Age</b>                                                       | <input type="text" value="0"/>      |
| <b>Village</b>                                                   | <input type="checkbox"/>            |
| <b>Nomadic</b>                                                   | <input type="checkbox"/>            |
| <b>Assistant Information</b>                                     |                                     |
| <b>Name of Data Enterer</b>                                      | <input type="text"/>                |
| <b>Name of Data Collector</b>                                    | <input type="text"/>                |
| <b>Principal Investigators: Charles H. King and Eric Muchiri</b> |                                     |

**RVF Ijara Clinical Survey Form: EXPOSURES**

RVFID

Data Collector Name

Data Entorer Name

**Non-Animal Exposures**

What type of settlement do you live in?

Was your home ever flooded?

When was it flooded?

Have you ever been displaced by a flood?

When were you displaced?

Do you use a mosquito net?

How often do you use the net?

Do you use fire?

How often do you use fire?

Do you use other forms of mosquito control?

Have you had a recent mosquito bite?

Have you had any personal illness?

When were you ill?

Have you had an ill family member?

When was your family member ill?

Have you had contact with a dead human body?

When was your contact with a dead body?

**Animal Exposures**

Please check any animal contact.      Sheep contact       Cow contact   
Goat contact       Camel contact

Have you sheltered livestock in your home?

camel  sheep  goat  cow  Other

Have you killed an animal?

camel  sheep  goat  cow  Other

**Have you butchered an animal?**

camel  sheep  goat  cow  Other

**Have you skinned an animal?**

camel  sheep  goat  cow  Other

**Have you cooked with meat?**

camel  sheep  goat  cow  Other

**Have you milked an animal?**

camel  sheep  goat  cow  Other

**Have you ever drank raw animal milk?**

camel  sheep  goat  cow  Other

**Have you ever cared for birthing animal?**

camel  sheep  goat  cow  Other

**Have you ever disposed of an aborted animal fetus?**

camel  sheep  goat  cow  Other

**Symptoms**      **Have you ever had any of the following symptoms?**  
**If yes, please indicate when.**

|                                                                   |                                                                            |                                                                     |
|-------------------------------------------------------------------|----------------------------------------------------------------------------|---------------------------------------------------------------------|
| <b>Fever</b> <input type="checkbox"/> <input type="text"/>        | <b>Red eyes</b> <input type="checkbox"/> <input type="text"/>              | <b>Hard to arouse</b> <input type="checkbox"/> <input type="text"/> |
| <b>Sick Feeling</b> <input type="checkbox"/> <input type="text"/> | <b>No appetite</b> <input type="checkbox"/> <input type="text"/>           | <b>Coma</b> <input type="checkbox"/> <input type="text"/>           |
| <b>Muscle aches</b> <input type="checkbox"/> <input type="text"/> | <b>Flushing</b> <input type="checkbox"/> <input type="text"/>              | <b>Neck stiffness</b> <input type="checkbox"/> <input type="text"/> |
| <b>Chills</b> <input type="checkbox"/> <input type="text"/>       | <b>Nausea</b> <input type="checkbox"/> <input type="text"/>                | <b>Poor vision</b> <input type="checkbox"/> <input type="text"/>    |
| <b>Backache</b> <input type="checkbox"/> <input type="text"/>     | <b>Vomiting</b> <input type="checkbox"/> <input type="text"/>              | <b>Nosebleeds</b> <input type="checkbox"/> <input type="text"/>     |
| <b>Eye pain</b> <input type="checkbox"/> <input type="text"/>     | <b>Painful eyes to light</b> <input type="checkbox"/> <input type="text"/> | <b>Vomiting Blood</b> <input type="checkbox"/> <input type="text"/> |
| <b>Headache</b> <input type="checkbox"/> <input type="text"/>     | <b>Confusion</b> <input type="checkbox"/> <input type="text"/>             | <b>Bloody stool</b> <input type="checkbox"/> <input type="text"/>   |
| <b>Rash</b> <input type="checkbox"/> <input type="text"/>         | <b>Spinning</b> <input type="checkbox"/> <input type="text"/>              | <b>Bruising</b> <input type="checkbox"/> <input type="text"/>       |

Principal Investigators: Charles H. King and Eric Muchiri

**RVF Ijara Clinical Survey Form: PHYSICAL EXAM**

RVFID  Weight  Height

General Wasted

Head

Eyes

Scleral hemorrhages  Scleral icterus

Ears

Nose

Throat

Neck

Normal movement

Chest

Heart

Murmur

Abdomen

Hepatomegaly  Splenomegaly

GU

Neuro

Skin

Jaundice  Petechiae  Purpura  Ecchymosis

Lymphadenopathy

Cervical  Axillary  Inguinal

Other

Name of Medical Doctor

Name of Data Enterer

Principal Investigators: Charles H. King and Eric Muchiri

**RVF Ijara Clinical Survey Form: OPHTHALMOLOGIC EXAM**

RVFID

Visual Acuity-OS

Visual Acuity-OD

Anterior Chamber-OS

Anterior Chamber-OD

Anterior Uveitis-OS

Anterior Uveitis-OD

Posterior Chamber-OS

Posterior Chamber-OD

Vitreous reaction-OS

Vitreous reaction-OD

Retina-OS

Retina-OD

Retinitis-OS  Macular-OS   
Paramacular-OS

Retinitis-OD  Macular-OD   
Paramacular-OD

Retinal Hemorrhage-OS

Retinal Hemorrhage-OD

Zone-OS

Zone-OD

Area-OS

Area-OD

Optic disc edema-OS

Optic disc edema-OD

Retinal vasculitis-OS

Retinal vasculitis-OD

RVF Related Disease-OS

RVF Related Disease-OD

Comments

Ophthalmologist Name  Data Enterer Name

Principal Investigators: Charles H. King and Eric Muchiri
