# Supplementary material for: Interepidemic Rift Valley Fever Virus Seropositivity, Northeastern Kenya
Source: PubMed Central journal article supplement (PMC2600406; doi:10.3201/eid1408.080082), 2008-08
Supplement: 08-0082_Techapp2-s2.pdf [file 08-0082_Techapp2-s2.pdf]

# Interepidemic Rift Valley Fever Virus Seropositivity, Northeastern Kenya

## Technical Appendix 2

### Binary Logistic Regression Analysis to Predict Rift Valley Fever Virus seropositivity

#### Logistic Model 1

Outcome variable: Rift Valley fever seropositivity (coded as 0 vs. 1)\*

| Predictor variable                 | Variable type | Point estimate (CI) | p value |
|------------------------------------|---------------|---------------------|---------|
| Age                                | Continuous    | 1.039 (1.017–1.062) | 0.001   |
| Location (Sogan-Godud vs. Gumarey) | Dichotomous   | 0.241 (0.092–0.628) | 0.004   |
| Gender (male vs. female)           | Dichotomous   | 2.782 (1.176–6.581) | 0.020   |
| Disposal of aborted animal         | Dichotomous   | 2.779 (1.026–7.525) | 0.044   |
| Constant                           |               | 0.119               | 0.005   |

\*CI, confidence interval. Goodness-of-fit:  $\chi^2$  analysis of observed vs. predicted values indicating model is well fit to observed values. Hosmer and Lemeshow test, step 1:  $\chi^2$ , 8.813; degrees of freedom, 8; p value, 0.358.

#### Logistic Model by Location, Gumarey

Outcome variable: Rift Valley fever seropositivity\*

| Predictor variables            | Variable type | Point estimate (CI) | p value |
|--------------------------------|---------------|---------------------|---------|
| Gender                         | Dichotomous   | 3.454 (1.17–10.19)  | 0.025   |
| Discarded aborted animal fetus | Dichotomous   | 15.12 (4.45–51.35)  | 0.0001  |
| Ill family member              | Dichotomous   | 18 (1.35–246.97)    | 0.029   |
| Constant                       |               | 0.029               | 0.0001  |

\*CI, confidence interval. Goodness-of-fit:  $\chi^2$  analysis of observed vs. predicted values indicating model is well fit to observed values. Hosmer and Lemeshow test, step 1:  $\chi^2$ , 5.493; degrees of freedom, 2; p value, 0.064.

#### Logistic Model by Location, Sogan-Godud

Outcome variable: Rift Valley fever seropositivity

| Predictor variables | Variable type | Point estimate (CI) | p value |
|---------------------|---------------|---------------------|---------|
| Age                 | Continuous    | 1.054 (1.019–1.091) | 0.0001  |
| Constant            |               | 0.01                | 0.0001  |

\*CI, confidence interval. Goodness-of-fit:  $\chi^2$  analysis of observed vs. predicted values indicating model is well fit to observed values. Hosmer and Lemeshow test, step 1:  $\chi^2$ , 9.318; degrees of freedom, 7; p value, 0.231.
